# Supplementary material for: Assembly of Drosophila Centromeric Chromatin Proteins during Mitosis
Source: PubMed Central journal article supplement (PMC3093364; doi:10.1371/journal.pgen.1002068), 2011-05-12
Supplement: pgen.1002068.s006.pdf [file pgen.1002068.s006.pdf]

**A**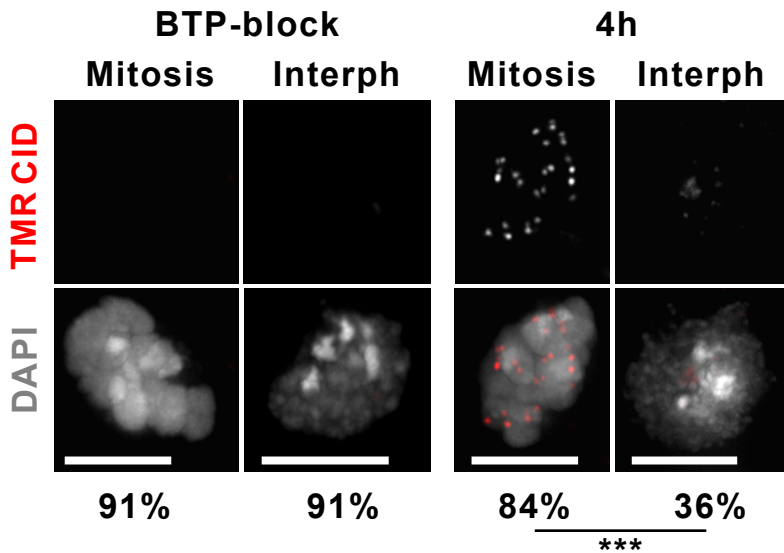**B**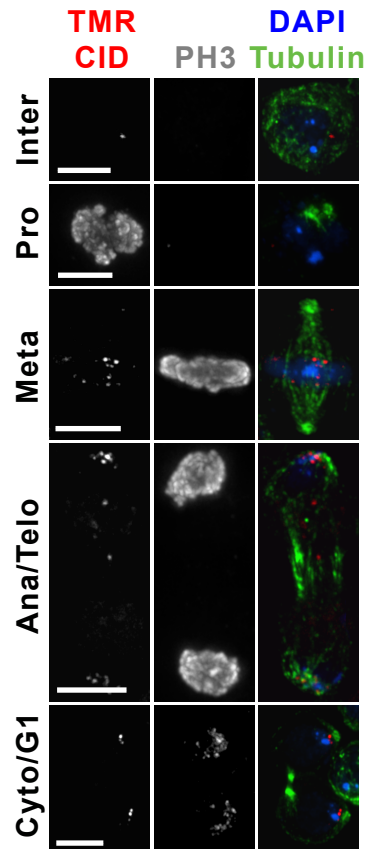**Figure S6**
